# Supplementary material for: The survivorship of the link endo-rotational hinge total knee arthroplasty: 5–12-year follow-up of 100 patients
Source: Springer Nature journal article supplement (doi:10.1007/s00402-018-3064-0), 2018-11-09
Supplement: MOESM1 [file 16262008]

## Sheet: Sheet1
Sex	Age at Op	Bilateral Link Hinge	Bilateral TKR	Side of Link Hinge	Primary or Revision	Indication	Underlying Dx	BMI at Op	Valgus / Varus Deformity	Complications	Implant Related Operations	Revision Status	Implant Survival
1	86.2067	0	1	1	1	1	1	27	1	0	0	0	1825
2	53.8508	0	0	1	2	2	1	34	0	0	0	0	1883
2	66.9897	0	0	2	2	9	1	28	0	0	0	0	1883
1	84.1314	0	1	1	1	3	3	23	1	Joint Infection	0	0	1921
1	77.5606	1	1	1	2	9	1	34	0	0	0	0	1924
1	87.0691	0	1	1	2	2	1	23	1	0	0	0	1925
1	76.9309	0	1	2	2	2	1	44	2	Wound Infection	0	0	1949
1	71.822	0	1	2	2	4	4	33	0	0	0	0	1956
2	61.2101	0	0	2	1	3	3	23	0	Haemarthrosis - 2 Aspirations, Infection -> Revision	1	1	696
1	59.1567	1	1	2	1	5	1	39	0	0	0	0	2132
1	78.6119	0	0	2	1	1	1	33	1	Pulmonary Oedema	0	0	2133
1	57.5003	0	0	1	1	3	3	44	2	0	0	0	2134
2	68.2026	0	0	1	2	9	1	32	2	Pulmonary Embolus	0	0	2135
2	83.7892	1	1	2	1	1	1	27	1	AF + Pulmonary Oedema. Pain and Instability	0	0	2138
1	59.1376	1	1	1	1	5	1	39	0	0	0	0	2139
2	72.846	0	0	2	2	6	1	46	2	0	0	0	2173
1	67.1294	0	0	2	1	1	1	27	1	0	0	0	2237
1	83.6359	0	1	2	2	9	1	45	0	0	0	0	2275
1	69.4565	0	0	2	2	2	1	30	0	0	Bushing Exchange - 11/12	0	2278
2	46.5216	0	0	2	2	9	0	30	1	Severe pain and instability -> Revision	Bushing Exchange - 02/13	1	1859
2	83.3867	1	1	1	1	1	1	27	0	0	0	0	2285
1	68.5613	0	0	1	2	6	1	26	1	0	0	0	2294
2	84.0849	0	0	1	1	1	1	31	1	0	0	0	2323
2	84.5476	0	1	2	1	1	1	24	1	0	0	0	2355
2	64.011	0	0	2	2	4	1	27	0	0	0	0	2365
1	53.6044	0	1	2	2	2	1	26	0	0	0	0	2401
2	70.2341	1	1	2	2	2	UNKNOWN	UNKNOWN	UNKNOWN	0	0	0	2412
1	88.6708	0	0	2	1	3	3	UNKNOWN	0	0	0	0	2418
1	70.6119	0	1	1	2	3	3	28	1	0	0	0	2418
1	59.5346	1	1	2	1	5	2	29	1	0	0	0	2464
1	59.5346	1	1	1	1	5	2	29	1	0	0	0	2464
2	69.7112	0	0	1	2	6	1	34	0	0	0	0	2481
2	37.4018	0	0	2	1	7	5	UNKNOWN	UNKNOWN	Instability & 2x Dislocations	Replacement of Axle & Grub Screw- 09/2008	0	2490
1	78.8802	0	1	2	2	6	1	29	0	Wound Infection	0	0	2513
1	70.0917	0	0	2	2	4	3	UNKNOWN	0	0	0	0	2517
1	62.8446	0	1	2	2	2	2	UNKNOWN	0	0	0	0	2534
1	76.334	1	1	2	2	2	1	31	0	0	0	0	2569
2	69.7741	1	1	1	2	2	UNKNOWN	UNKNOWN	UNKNOWN	0	0	0	2580
1	89.5715	0	0	1	1	5	1	18	1	Post-Op Stroke	0	0	2631
1	77.807	0	0	1	1	5	1	22	1	0	0	0	2699
1	56.4654	1	1	1	1	5	2	34	0	Joint Infection	0	0	2716
1	56.4545	1	1	2	1	5	2	34	0	0	0	0	2720
1	82.2888	0	0	1	2	4	4	25	0	(Recurrent) Joint Infection -> Revision	1	1	563
1	73.8316	0	1	1	1	5	1	33	1	0	0	0	2747
1	76.7775	0	0	1	2	6	1	UNKNOWN	0	0	0	0	2805
2	67.7317	0	0	2	2	2	1	22	0	0	0	0	2818
1	78.0698	0	1	1	1	3	2	25	1	0	0	0	2917
1	79.8905	0	1	1	2	4	4	UNKNOWN	UNKNOWN	0	0	0	2922
1	85.5086	0	1	2	2	2	1	30	0	0	0	0	2925
1	82.4339	0	0	1	1	3	3	23	0	0	0	0	2974
1	75.1184	1	1	1	2	2	1	31	1	0	0	0	3013
2	82.3326	0	1	1	2	4	4	25	0	0	0	0	3024
1	76.0055	0	0	2	2	UNKNOWN	UNKNOWN	UNKNOWN	UNKNOWN	0	0	0	3065
2	62.0917	1	1	2	2	9	1	29	0	Wound Infection	0	0	3105
1	92.5722	0	0	1	2	9	1	22	2	0	0	0	3139
1	53.6044	0	1	1	2	UNKNOWN	2	UNKNOWN	UNKNOWN	0	0	0	3140
1	58.3053	0	1	2	2	4	2	19	1	0	0	0	3206
1	78.7543	0	0	2	1	3	1	16	1	0	0	0	3238
1	73.6372	0	1	1	2	6	1	UNKNOWN	UNKNOWN	0	0	0	3238
1	81.0349	1	1	1	1	UNKNOWN	UNKNOWN	UNKNOWN	UNKNOWN	0	0	0	3266
1	77.9986	0	0	1	1	1	1	UNKNOWN	UNKNOWN	0	0	0	3302
1	71.5181	0	0	1	2	8	6	25	2	0	0	0	3332
1	76.9719	0	1	2	2	UNKNOWN	UNKNOWN	UNKNOWN	UNKNOWN	0	0	0	3337
2	63.6879	0	0	2	2	4	4	38	UNKNOWN	(Recurrent) Joint Infection	0	0	3353
1	71.154	0	0	1	1	8	6	UNKNOWN	UNKNOWN	0	0	0	3358
1	78.3107	0	0	2	1	9	1	UNKNOWN	UNKNOWN	0	0	0	3381
2	85.5907	0	0	1	1	3	UNKNOWN	UNKNOWN	UNKNOWN	0	0	0	3419
2	79.1458	0	1	2	2	4	4	UNKNOWN	UNKNOWN	0	0	0	3497
1	80.3778	1	1	2	1	UNKNOWN	UNKNOWN	UNKNOWN	UNKNOWN	Joint Infection -> Revision	1	1	1008
1	79.3922	0	0	1	2	4	4	UNKNOWN	UNKNOWN	0	0	0	3518
1	63.9726	0	1	2	1	3	1	39	0	0	0	0	3531
1	79.1622	0	1	2	1	UNKNOWN	UNKNOWN	UNKNOWN	UNKNOWN	0	0	0	3576
2	82.6393	0	1	1	2	UNKNOWN	UNKNOWN	UNKNOWN	UNKNOWN	0	0	0	3629
1	75.77	0	1	1	2	2	2	41	2	Joint Infection	0	0	3632
1	71.4387	0	0	1	1	3	3	31	0	Joint Infection	0	0	3658
2	72.3176	0	0	2	2	9	8	28	0	Aspetic Loosening -> Revision	1	1	2324
1	77.8179	0	0	2	2	4	4	UNKNOWN	UNKNOWN	Post-Op Diarrhoea Infection	0	0	3673
2	60.4244	1	1	1	2	2	1	29	0	0	0	0	3714
1	77.5743	1	0	1	1	UNKNOWN	UNKNOWN	UNKNOWN	UNKNOWN	Joint Infection	0	0	3717
2	69.6865	0	0	2	2	4	4	31	0	(Recurrent) Joint Infection -> Revision	1	1	368
1	82.7734	0	0	2	1	UNKNOWN	1	UNKNOWN	UNKNOWN	0	0	0	3731
1	74.0123	0	1	2	2	2	1	34	UNKNOWN	0	0	0	3745
1	36.4682	0	0	2	2	UNKNOWN	UNKNOWN	UNKNOWN	UNKNOWN	0	0	0	3905
1	57.2348	0	0	2	1	3	1	45	0	Periprosthetic Fracture - 3/12, Infection - 03/14	0	0	3995
1	74.4586	0	1	2	2	UNKNOWN	UNKNOWN	UNKNOWN	UNKNOWN	Haematoma	0	0	4018
2	70.2916	0	1	2	2	4	4	37	0	Peri-prosthetic Fracture Causing Loosening -> Revision	1	1	2726
1	82.0589	0	0	2	1	1	1	UNKNOWN	2	0	0	0	4060
1	77.4538	0	1	2	1	9	1	31	UNKNOWN	0	0	0	4063
2	66.1109	1	1	1	2	4	4	UNKNOWN	UNKNOWN	0	0	0	4066
1	82.0287	0	1	1	2	UNKNOWN	1	UNKNOWN	UNKNOWN	Joint Infection	0	0	4067
2	66.6995	0	0	1	2	9	1	27	2	Joint Infection -> Revision	1	1	84
1	84.9391	0	1	1	1	1	1	UNKNOWN	2	0	0	0	4095
2	61.1143	0	0	2	2	2	4	UNKNOWN	0	Post Operative Anaemia	0	0	4130
2	73.1581	0	0	1	2	9	1	28	0	Loosening of Tibial Component	0	0	4170
2	73.4127	0	1	1	2	2	1	27	0	0	0	0	4172
2	70.078	0	1	1	2	4	4	36	UNKNOWN	0	0	0	4179
2	77.0787	0	0	2	2	2	1	27	0	0	0	0	4252
2	66.4531	0	0	1	2	4	4	34	0	(Recurrent) Joint Infection	0	0	4254
1	81.358	0	0	2	1	1	1	UNKNOWN	1	0	0	0	4401
1	82.5489	0	0	2	1	3	3	UNKNOWN	UNKNOWN	0	0	0	4472
1 = F		0 = UNILATERAL LINK	0 = UNILATERAL TKR	1 = LEFT		1 = JOINT INSTABILITY	1 = OSTEOARTHRITIS		1 = Valgus
2 = M		1 = BILATERAL LINK	1 = BILATERAL TKR	2 = RIGHT		2 = IMPLANT INSTABILITY	2 = RHEUMATOID ARTHRITIS		2 = Varus
				3 = BOTH		3 = FRACTURE	3 = FRACTURE
						4 = INFECTION	4 = INFECTION
						5 = JOINT DEFORMITY	5 = TUMOUR
						6 = IMPLANT FAILURE	6 = AVASCULAR NECROSIS
						7 = TUMOUR	7 = ANKYLOSING SPONDYLITIS
						8 = AVASCULAR NECROSIS	8 = OSTEOMYELITIS
						9= PAIN
